# Supplementary material for: Structure and ionic conductivity of liquid crystals having propylene carbonate units
Source: Royal Society of Chemistry journal article supplement (doi:10.1039/c4ta05401f), 2014-12-09
Supplement: c4ta05401f1.pdf [file c4ta05401f1.pdf]

**SUPPORTING INFORMATION for Structure and ionic conductivity of liquid crystals having propylene carbonate units**

Andreas Eisele<sup>1</sup>, Konstantinos Kyriakos<sup>2</sup>, Rajesh Bhandary<sup>3,4</sup>, Monika Schönhoff<sup>3</sup>, Christine M. Papadakis<sup>2</sup>, Bernhard Rieger<sup>1\*</sup>

<sup>1</sup>WACKER-Lehrstuhl für Makromolekulare Chemie, Technische Universität München, Lichtenbergstr. 4, 85747 Garching bei München (Germany)

<sup>2</sup>Fachgebiet Physik weicher Materie, Physik-Department, Technische Universität München, James-Franck-Str. 1, 85747 Garching bei München (Germany)

<sup>3</sup>Institut für Physikalische Chemie, University of Muenster, Corrensstr. 28/30, 48149 Münster (Germany)

<sup>4</sup>NRW Graduate School of Chemistry, University of Muenster, Wilhelm-Klemm-Str. 10, D-48149 Münster, (Germany)

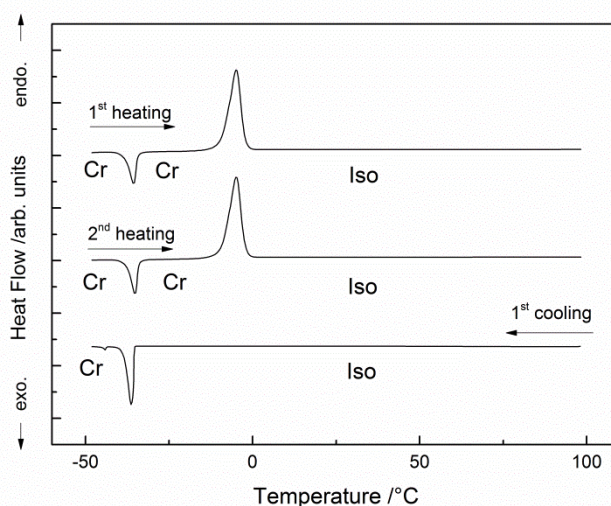

**Fig. S1.** DSC traces for substance **6**.

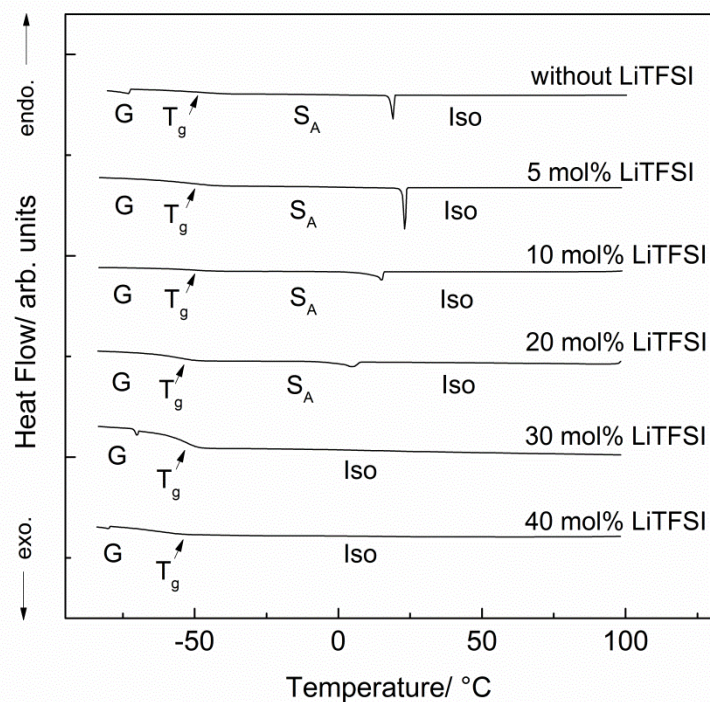

**Fig. S2.** DSC traces recorded during first cooling scans for the mixtures of compound **4a** with different amounts of LiTFSI.

**Table S1.** Thermal transitions of compound **4a** and its complexes with LiTFSI (enthalpy (J/g) in parentheses) detected by DSC from the first cooling scans.

| Mol% LiTFSI | Phase transition (°C) and corresponding enthalpy changes (J/g) <sup>a</sup> |            |                |       |   |
|-------------|-----------------------------------------------------------------------------|------------|----------------|-------|---|
| 0           | Iso                                                                         | 19.8 (2.5) | S <sub>A</sub> | -47.1 | G |
| 5           | Iso                                                                         | 23.1 (2.3) | S <sub>A</sub> | -49.6 | G |
| 10          | Iso                                                                         | 17.8 (3.5) | S <sub>A</sub> | -49.5 | G |
| 20          | Iso                                                                         | 4.6 (1.4)  | S <sub>A</sub> | -49.2 | G |
| 30          | Iso                                                                         | -53.0      | G              |       |   |
| 40          | Iso                                                                         | -53.9      | G              |       |   |

<sup>a</sup> S<sub>A</sub>, smectic A; Iso, isotropic; G, glassy

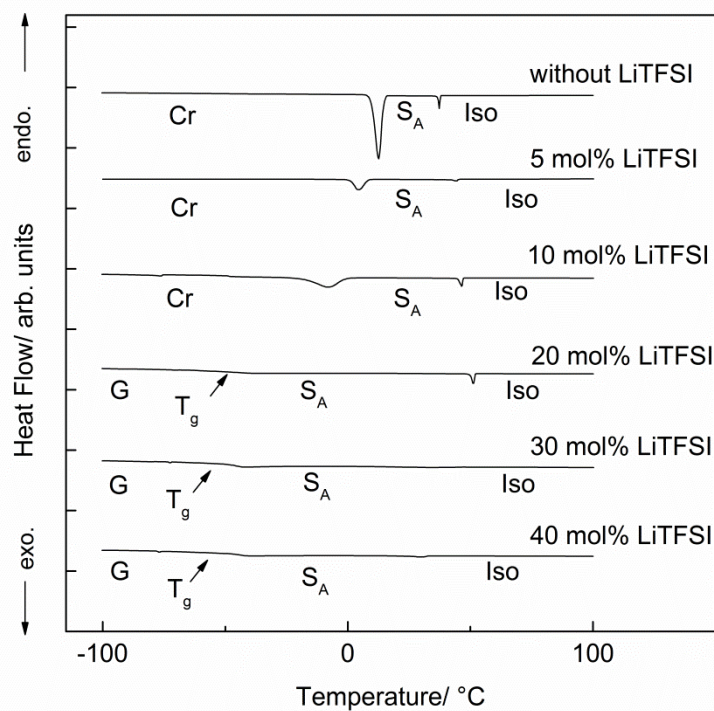

**Fig. S3.** DSC traces recorded during first cooling scans for the mixtures of compound **4b** with different amounts of LiTFSI.

**Table S2.** Thermal transitions of compound **4b** and its complexes with LiTFSI (enthalpy (J/g) in parentheses) detected by DSC from the first cooling scans.

| Mol% LiTFSI | Phase transition (°C) and corresponding enthalpy changes (J/g) <sup>a</sup> |            |                |             |    |
|-------------|-----------------------------------------------------------------------------|------------|----------------|-------------|----|
| 0           | Iso                                                                         | 37.3 (2.6) | S <sub>A</sub> | 12.7 (53.9) | Cr |
| 5           | Iso                                                                         | 43.7 (2,5) | S <sub>A</sub> | -1.5 (40.9) | Cr |
| 10          | Iso                                                                         | 46.4 (2.2) | S <sub>A</sub> | -8.2 (21.1) | Cr |
| 20          | Iso                                                                         | 51.3 (1.7) | S <sub>A</sub> | -46.1       | G  |
| 30          | Iso                                                                         | 34.3 (0.8) | S <sub>A</sub> | -45.4       | G  |
| 40          | Iso                                                                         | 29.7 (0.7) | S <sub>A</sub> | -43.6       | G  |

<sup>a</sup> Cr, crystalline; S<sub>A</sub>, smectic A; Iso, isotropic; G, glassy

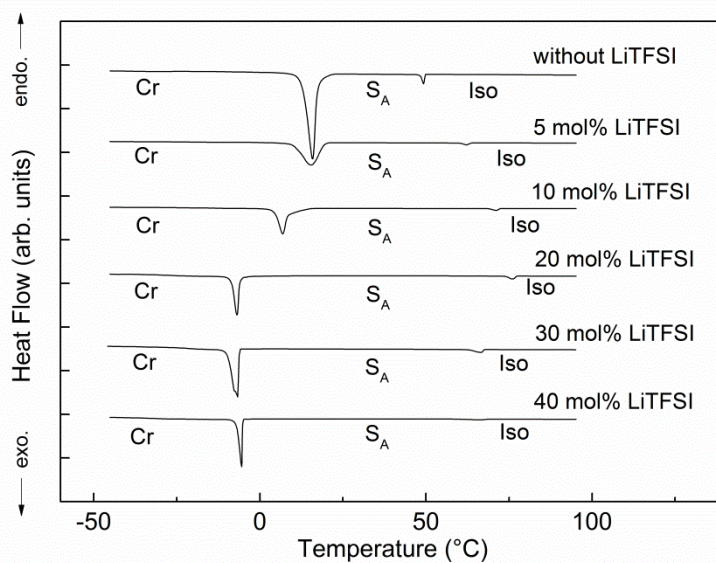

**Fig. S4.** DSC traces recorded during first cooling scans for the mixtures of compound **4c** with different amounts of LiTFSI.

**Table S3.** Thermal transitions of compound **4c** and its complexes with LiTFSI (enthalpy (J/g) in parentheses) detected by DSC from the first cooling scan.

| Mol% LiTFSI | Phase transition (°C) and corresponding enthalpy changes (J/g) <sup>a</sup> |            |                |             |        |          |
|-------------|-----------------------------------------------------------------------------|------------|----------------|-------------|--------|----------|
| 0           | Iso                                                                         | 49.2 (2.1) | S <sub>A</sub> | 15.9 (63.5) | Cr     |          |
| 5           | Iso                                                                         | 62.1 (1.8) | S <sub>A</sub> | 15.9 (62.8) | Cr     |          |
| 10          | Iso                                                                         | 71.1 (1.7) | S <sub>A</sub> | 6.8 (40.6)  | Cr     |          |
| 20          | Iso                                                                         | 75.9 (1.7) | S <sub>A</sub> | -6.9 (21.8) | Glassy | -26.3 Cr |
| 30          | Iso                                                                         | 66.6 (1.5) | S <sub>A</sub> | -6.7 (20.2) | Glassy | -20.6 Cr |
| 40          | Iso                                                                         | 64.9 (1.1) | S <sub>A</sub> | -5.5 (20.6) | Glassy | -33.0 Cr |

<sup>a</sup> Cr, crystalline; S<sub>A</sub>, smectic A; Iso, isotropic

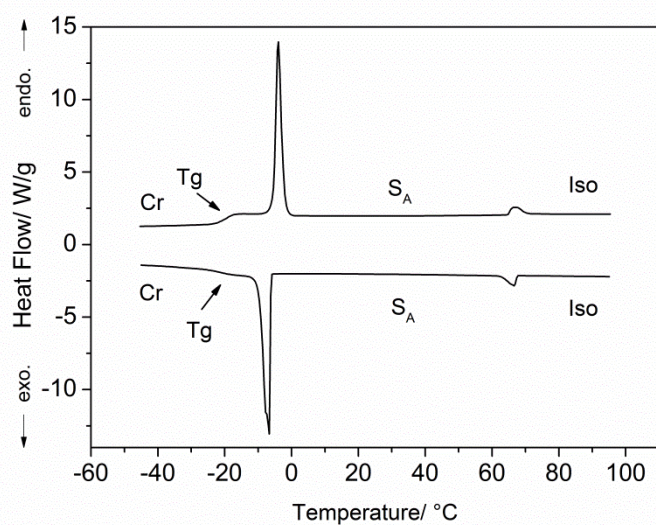

**Fig. S5.** DSC traces for substance **4c** mixed with 30 mol% LiTFSI on the heating and cooling scan showing the formation of an enantiotropic mesophase.

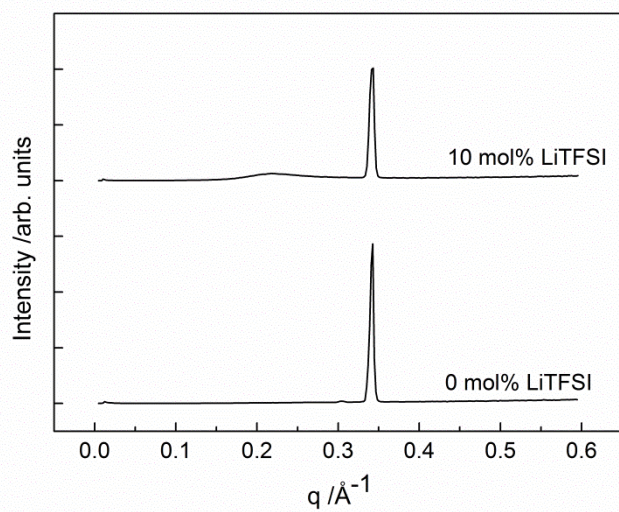

**Fig. S6** SAXS curves of compound **4a** with various amounts of LiTFSI. The curves were shifted vertically for clarity.

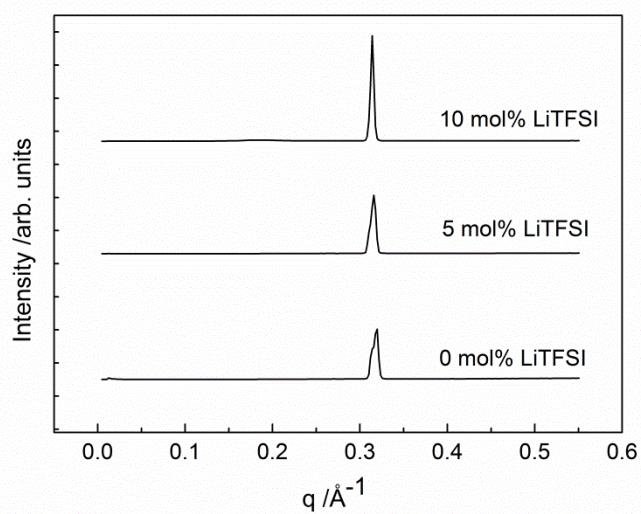

**Fig. S7** SAXS curves of compound **4b** with various amounts of LiTFSI. The curves were shifted vertically for clarity.

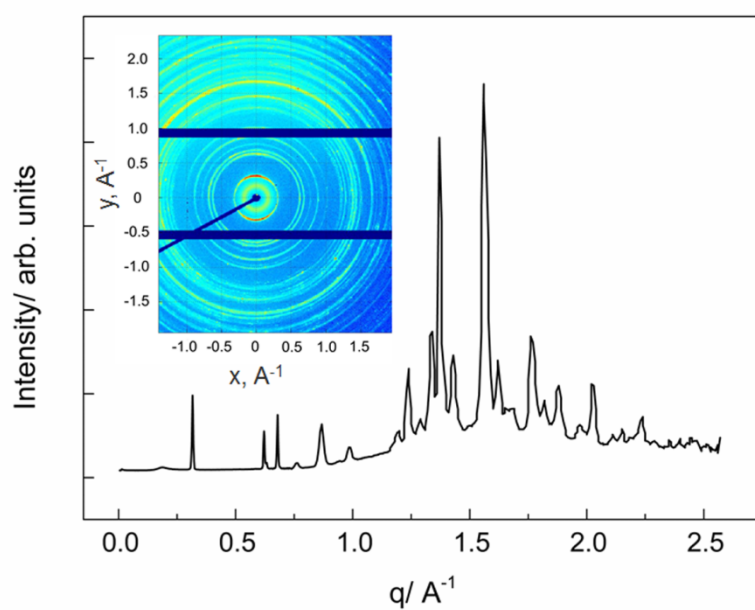

**Fig. S8.** WAXS and SAXS curves for **4b** mixed with 10 mol% LiTFSI at room temperature. The inset shows the 2D WAXS image of the compound.

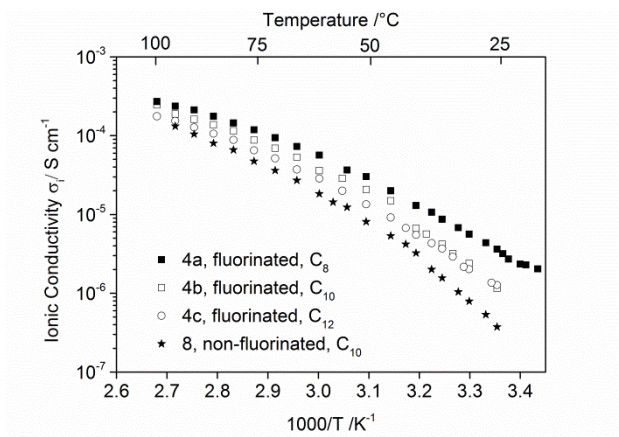

**Fig. S9.** Arrhenius plots of ionic conductivity ( $\sigma_{i\parallel}$ ) for the compounds **4a**, **4b**, **4c** and **8** with 10 mol% LiTFSI measured on cooling with cell A.

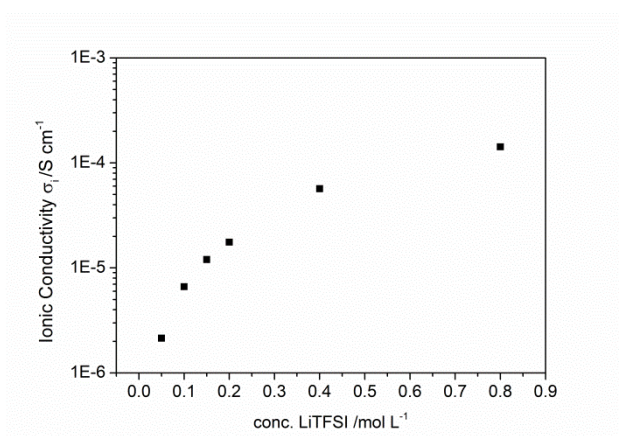

**Fig. S10.** Ionic conductivity ( $\sigma_i$ ) of **6** at  $T = 30^\circ\text{C}$  with various amounts of LiTFSI.

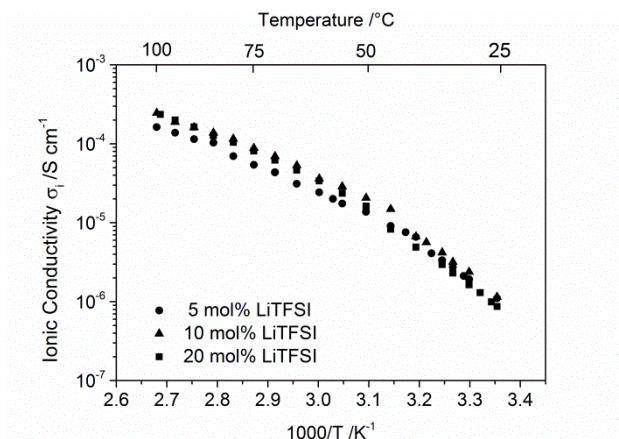

**Fig. S11.** Ionic conductivity ( $\sigma_i$ ) of **4b** with various amounts of LiTFSI measured on cooling with cell A.

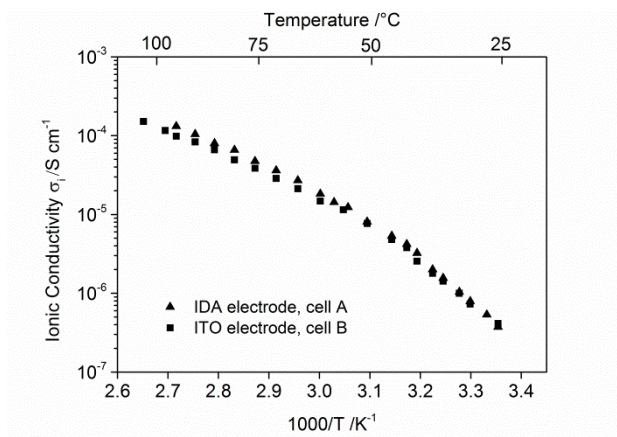

**Fig. S12.** Arrhenius plots of ionic conductivity for the compounds **8** with 10 mol% LiTFSI measured on cooling with cell A and cell B.

**Table S4** Molecular weight, mass density and salt concentration  $C$  of the compounds **4a**, **4b** and **6** with 10 mol% LiTFSI.

| Compound          | $M_w$<br>(g/mol) | $\rho$<br>(g/cm <sup>3</sup> ) | $C$<br>(mol/cm <sup>3</sup> ) |
|-------------------|------------------|--------------------------------|-------------------------------|
| 4a/10 mol% LiTFSI | 422.4            | 1.15                           | $3.3 \times 10^{-4}$          |
| 4b/10 mol% LiTFSI | 450.4            | 1.18                           | $2.7 \times 10^{-4}$          |
| 6/10mol% LiTFSI   | 554.7            | 1.20                           | $1.9 \times 10^{-4}$          |



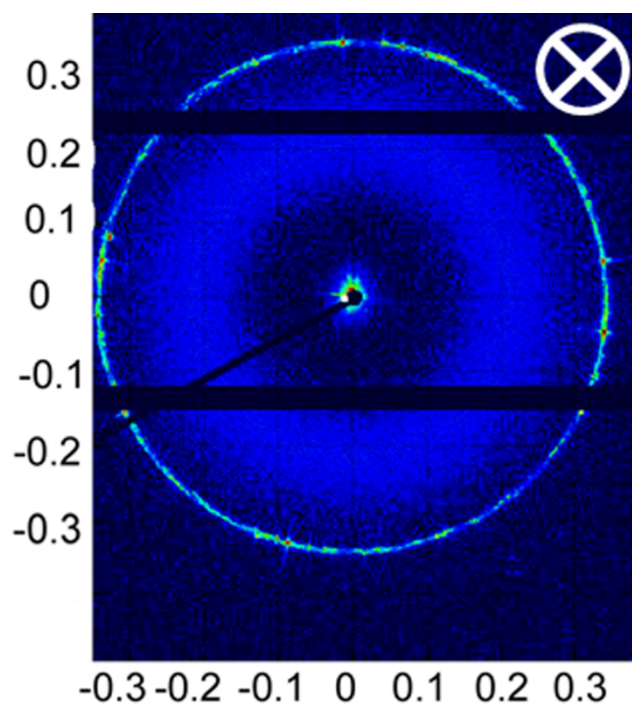

**Fig. S13.** 2D SAXS image of **4a** with 10 mol% LiTFSI after treatment in a magnetic field. The smectic layer plane is oriented perpendicular to the surface in direction of the magnetic field. The cross indicates the direction of the applied magnetic field.

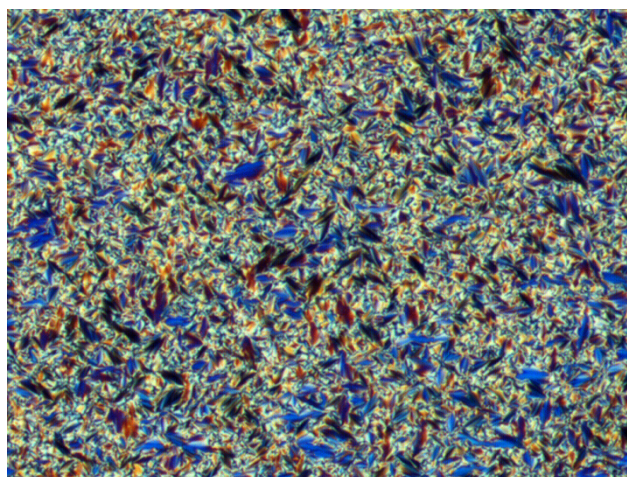

**Fig. S14.** POM picture of substance **4b** mixed with 10 mol% LiTFSI on cooling from isotropic melt. Substance forms polydomains.

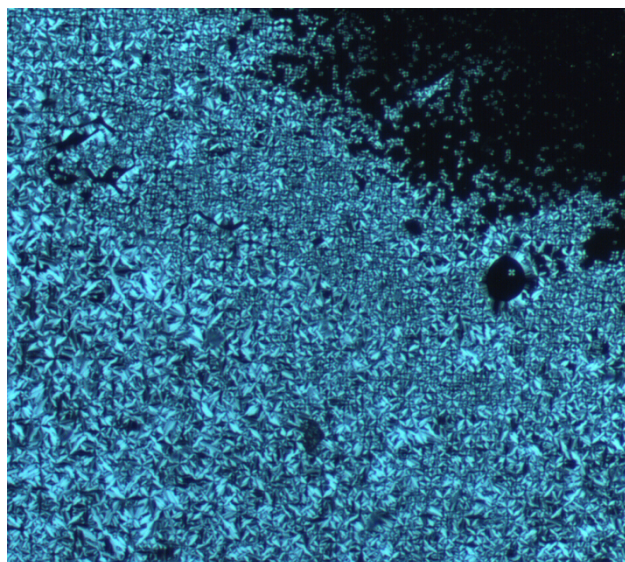

**Fig. S15.** POM picture of substance **8** on cooling from isotropic melt. Right up: Formation of focal conic texture; Left down: Formation of fan-shaped texture. Both textures are an indication for the formation of a  $S_A$  mesophase.

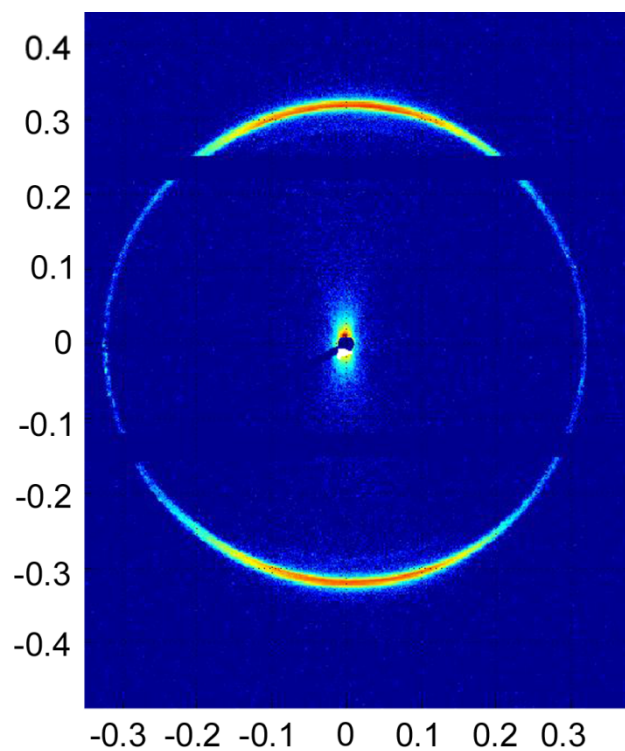

**Fig. S16.** 2D SAXS image of **4b** without LiTFSI.

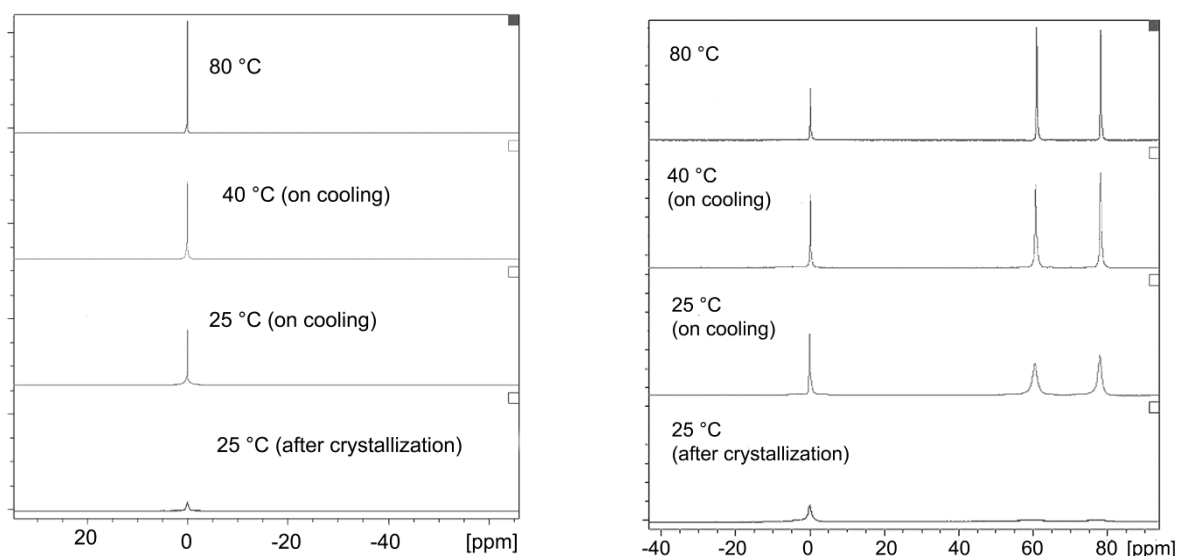

**Fig. S17.** Right:  ${}^7\text{Li}$  spectra of **4a** mixed with 10 mol% LiTFSI observed on cooling from 80 °C. Left:  ${}^{19}\text{F}$  NMR spectra of **4a** mixed with 10 mol% LiTFSI observed on cooling from 80 °C. Besides the  ${}^{19}\text{F}$  of LiTFSI (0.0 ppm), the  ${}^{19}\text{F}$  spectra showed also two  ${}^{19}\text{F}$  resonances from the perfluorinated aromatic core.

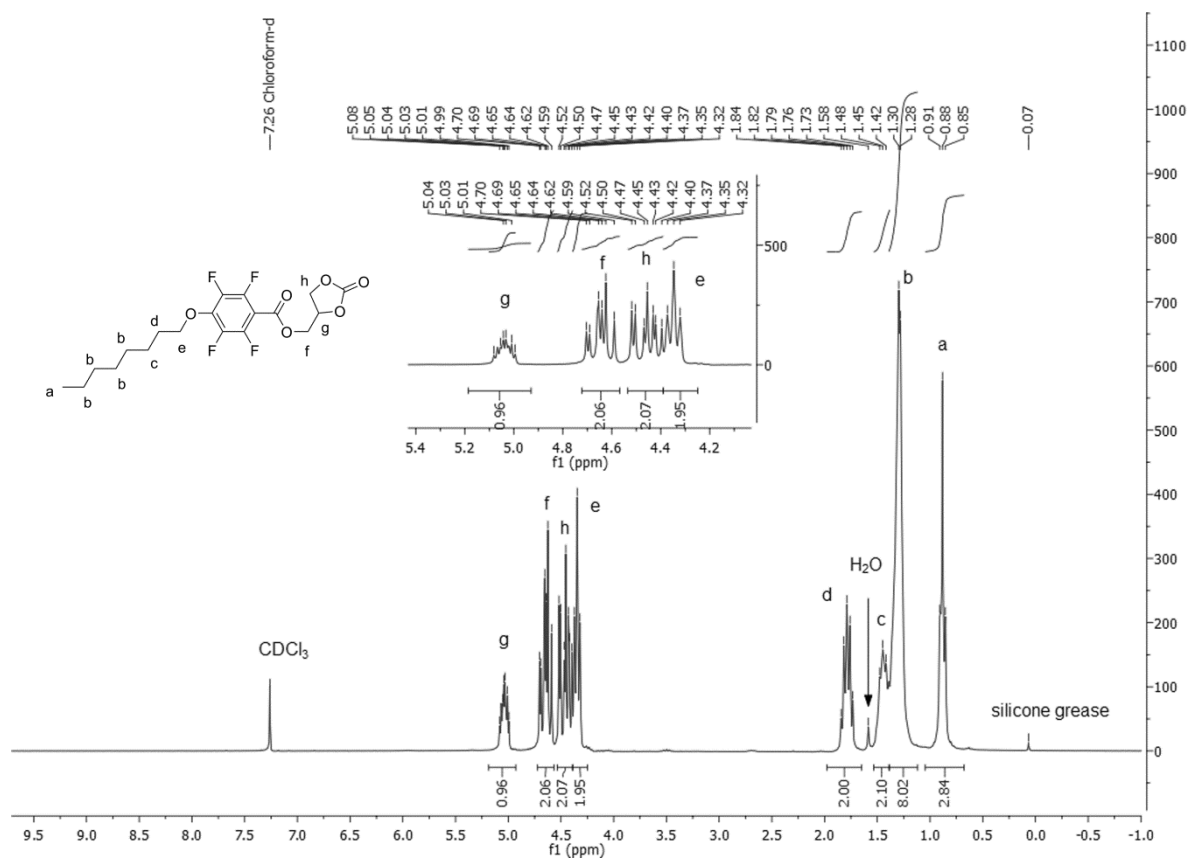

**Fig. S18.**  ${}^1\text{H}$  NMR spectrum of substance **4a**.

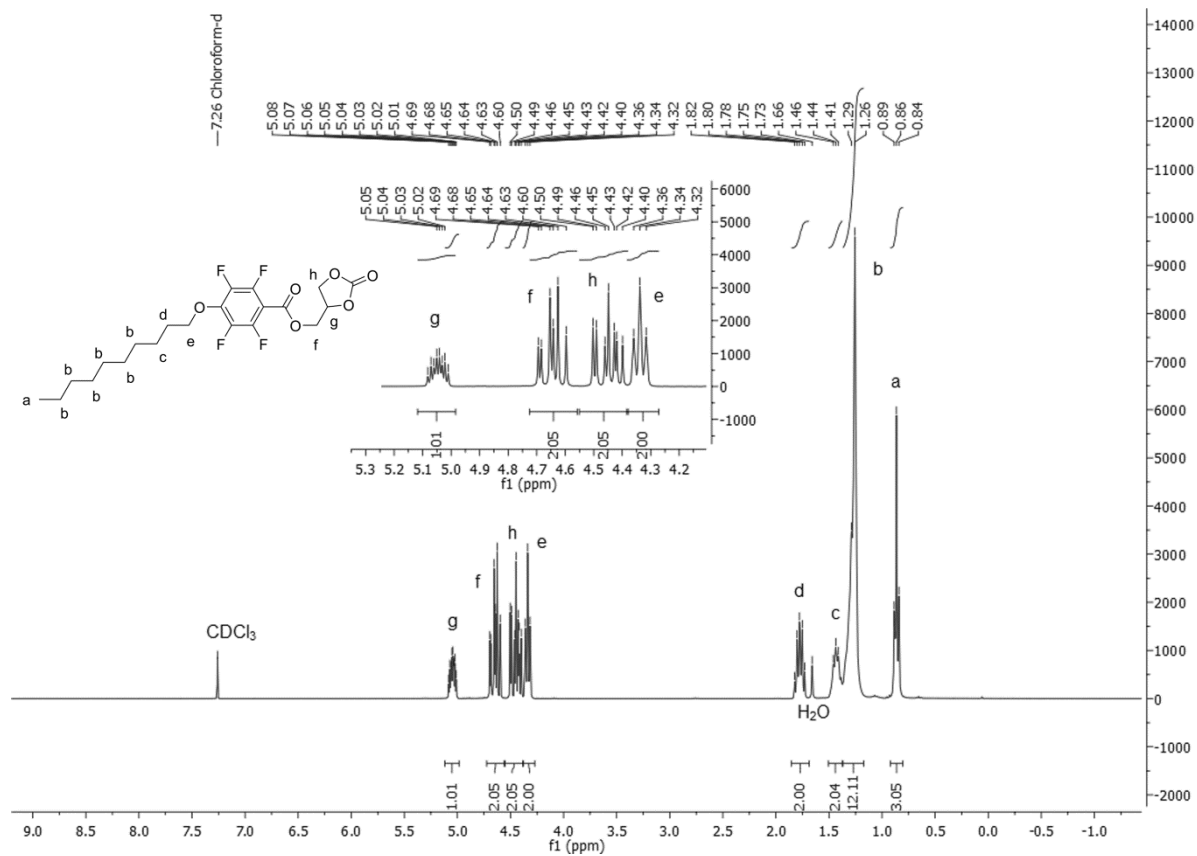

**Fig. S19.** <sup>1</sup>H NMR spectrum of substance **4b**.

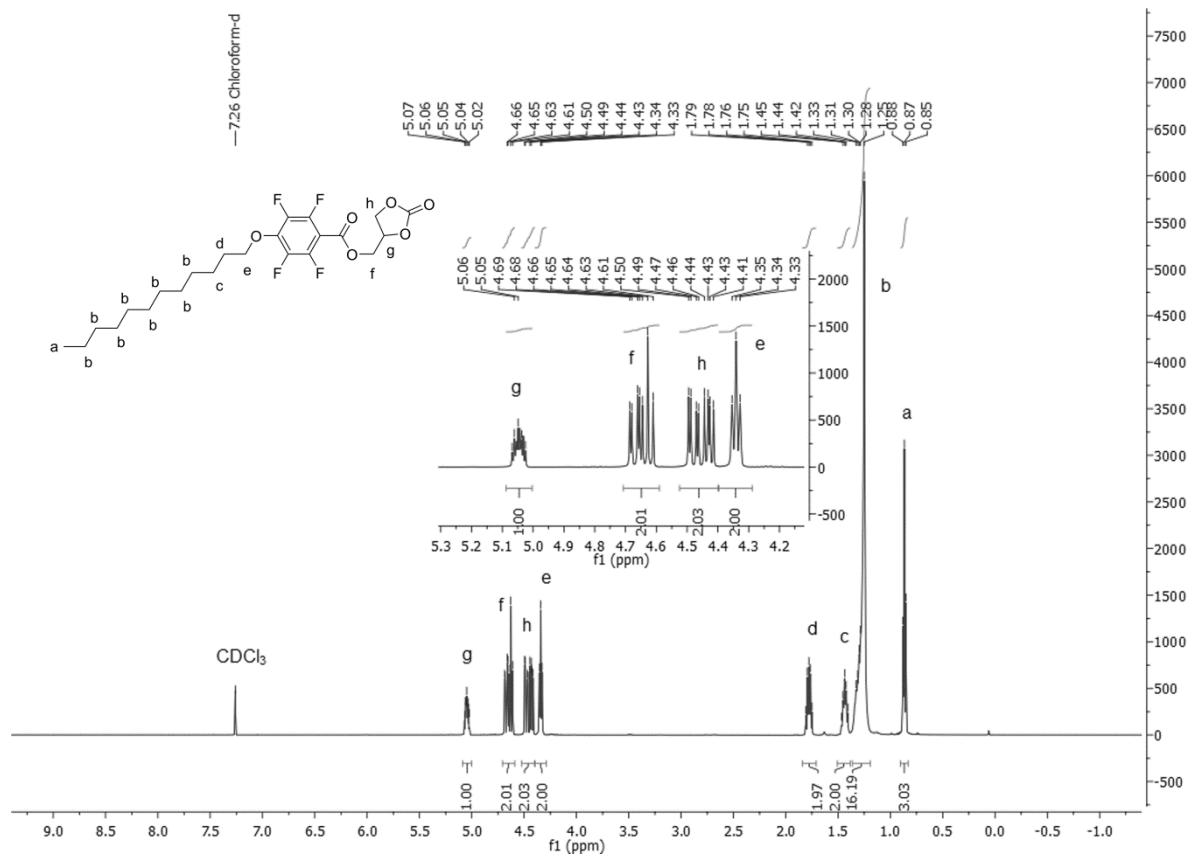

**Fig. S20.** <sup>1</sup>H NMR spectrum of substance **4c**.
